# Choice of Anesthetic Combination Determines Ca<sup>2+</sup> Leak after Ischemia-Reperfusion Injury in the Working Rat Heart

## Favorable versus Adverse Combinations

Michael Zaugg, M.D., M.B.A.,\* Lianguo Wang, M.D.,† Liyan Zhang, Ph.D.,‡ Phing-How Lou, Ph.D.,§ Eliana Lucchinetti, Ph.D.,|| Alexander S. Clanachan, Ph.D.#

### ABSTRACT

**Background:** There is a lack of studies investigating cardioprotection by common combinations of anesthetics. However, because a general anesthetic consists of a mixture of drugs with potentially interfering effects on signaling and cytoprotection, the most favorable combination should be used.

**Methods:** Working rat hearts were exposed to 20 min of ischemia and 30 min of reperfusion. Periischemic sevoflurane (2 vol-%), propofol (10  $\mu$ M), or remifentanyl (3 nM) (single treatments) and the three combinations thereof (combination treatments) were assessed for their ability to improve postischemic left ventricular work and to prevent intracellular Ca<sup>2+</sup> leak and overload. Beat-to-beat oscillations

\* Professor, Department of Anesthesiology and Pain Medicine, University of Alberta, Edmonton, Alberta, Canada. † Research Associate, Department of Anesthesiology and Pain Medicine, and Department of Pharmacology, University of Alberta. ‡ Research Associate, Department of Anesthesiology and Pain Medicine, University of Alberta. § Postdoctoral Fellow, Department of Anesthesiology and Pain Medicine, University of Alberta. || Senior Researcher, Department of Anesthesiology and Pain Medicine, University of Alberta. # Professor and Chair, Department of Pharmacology, University of Alberta.

Received from the Department of Anesthesiology and Pain Medicine, University of Alberta, Edmonton, Alberta, Canada. Submitted for publication June 8, 2011. Accepted for publication November 21, 2011. Supported by grants from the Heart and Stroke Foundation of Alberta, Northwest Territories, and Nunavut, Calgary, Alberta, Canada (Dr. Zaugg and Dr. Clanachan), a grant from the Mazankowski Alberta Heart Institute, Edmonton, Alberta, Canada (Dr. Zaugg), a grant from Abbott Canada, Saint-Laurent, Canada (Dr. Zaugg), grant #3200B0-103980/1 of the Swiss National Science Foundation, Berne, Switzerland (Dr. Zaugg), and the 5th Frontiers in Anesthesia Research Award from the International Anesthesia Research Society, Cleveland, Ohio (Dr. Zaugg). Drs. Zaugg, Lucchinetti, and Clanachan similarly contributed to the work.

Address correspondence to Dr. Zaugg: Department of Anesthesiology and Pain Medicine, University of Alberta CSB Room 8-120, Edmonton, Alberta T6G 2G3, Canada. michael.zaugg@ualberta.ca. Information on purchasing reprints may be found at [www.anesthesiology.org](http://www.anesthesiology.org) or on the masthead page at the beginning of this issue. ANESTHESIOLOGY's articles are made freely accessible to all readers, for personal use only, 6 months from the cover date of the issue.

Copyright © 2012, the American Society of Anesthesiologists, Inc. Lippincott Williams & Wilkins. Anesthesiology 2012; 116:648-57

### What We Already Know about This Topic

- Volatile anesthetics, propofol, and opioids may elicit cardioprotection in hearts exposed to ischemia-reperfusion injury

### What This Article Tells Us That Is New

- The choice of anesthetic combination determines the post-ischemic sarcoplasmic Ca<sup>2+</sup> leak and intracellular Ca<sup>2+</sup> overload after ischemia-reperfusion injury in the working rat heart

in intracellular [Ca<sup>2+</sup>] were measured using indo-1 AM. Phosphorylation of calcium/calmodulin-dependent protein kinase II $\delta$ , ryanodine receptor-2, and phospholamban was determined.

**Results:** The single treatments with sevoflurane or remifentanyl were highly protective with respect to functional recovery and Ca<sup>2+</sup> overload, but propofol, even at high concentrations, did not show similar protection. Sevoflurane combined with propofol completely lost its protection in the presence of low sedative propofol concentrations ( $\geq 1$   $\mu$ M), whereas remifentanyl combined with propofol (10  $\mu$ M) retained its protection. Propofol antagonism of sevoflurane protection was concentration-dependent and mimicked by the reactive oxygen species scavenger *N*-2-mercapto-propionyl-glycine. Addition of propofol to sevoflurane activated calcium/calmodulin-dependent protein kinase type II $\delta$  and hyperphosphorylated the ryanodine receptor-2, consistent with causing a postischemic Ca<sup>2+</sup> leak from the sarcoplasmic reticulum. Remifentanyl did not enhance sevoflurane protection.

**Conclusions:** The choice of anesthetic combination determines the postischemic Ca<sup>2+</sup> leak and intracellular overload. The results from these experiments will help to design studies for optimizing perioperative cardioprotection in high-risk surgical patients.

Supplemental digital content is available for this article. Direct URL citations appear in the printed text and are available in both the HTML and PDF versions of this article. Links to the digital files are provided in the HTML text of this article on the Journal's Web Site ([www.anesthesiology.org](http://www.anesthesiology.org)).

**M**ETA-analyses on the antiischemic cardioprotective properties of general anesthetic agents in high-risk surgical patients remain elusive. Even for volatile anesthetics, a highly promising class of cardioprotective drugs, the currently available evidence is still controversial.<sup>1</sup> Some studies show impressive postischemic functional improvement and favorable changes in biomarkers associated with cardioprotection,<sup>2,3</sup> whereas other studies could only find mediocre or no signs of protection.<sup>4</sup> Nonetheless, the American Heart Association recommends in its current Guidelines for Perioperative Management of High-Risk Surgical Patients Undergoing Noncardiac Surgery the preferential use of volatile anesthetics in these patients.<sup>5</sup>

In sharp contrast to these disparate clinical findings, there is overwhelming evidence of cardioprotection in the experimental setting, not only by volatile anesthetics but also by other anesthetics<sup>6,7</sup> such as propofol<sup>8</sup> and opioid receptor agonists.<sup>9</sup> We and others have previously speculated that this discrepancy between experimental and clinical observations might be explained, in part, by the fact that diseased diabetic and/or infarct-remodeled hearts of patients may be less amenable to pharmacologic protection against ischemia–reperfusion (IR) injury.<sup>10</sup> Another possible explanation could be potential antagonistic interactions between individual anesthetics when used in combination resulting in a loss of cardioprotection. In fact, it is well known that some frequently used perioperative drugs enhance (nitroglycerin, statins), whereas others abolish (sulfonylureas, cyclooxygenase-2 inhibitors,  $\beta$ -adrenoceptor antagonists) the most effective endogenous mechanism of cardioprotection, namely preconditioning.<sup>11</sup> One recent study in rabbit hearts demonstrated inhibitory effects of propofol on desflurane-induced preconditioning,<sup>12</sup> whereas another study showed that morphine could enhance cardioprotection by isoflurane preconditioning.<sup>13</sup> However, so far no study has systematically explored the interaction between common clinically used anesthetics on cardioprotection. The question of whether and how different combinations of anesthetics might antagonize or potentiate their effects on cardioprotection is essential for the clinician, because a general anesthetic procedure consists of a mixture of drugs, and the most favorable cardioprotective combination of anesthetics should be preferentially used in at-risk patients. To gain insight into such interactions, we designed a study using a standardized experimental model, *i.e.*, the working rat heart, in which the net effects of three combinations of anesthetics, namely sevoflurane, propofol, and remifentanyl, were examined on the recovery of postischemic left ventricular work. In addition, to obtain a mechanistic understanding of potential interactions, we used this experimental model to measure drug-induced alterations in  $\text{Ca}^{2+}$  overload and sarcoplasmic  $\text{Ca}^{2+}$  leak. We hypothesized that certain combinations would show antagonism, whereas others might show synergy in cardioprotection.

## Materials and Methods

The investigation conforms to the Guide for the Care and Use of Laboratory Animals published by the US National Institutes of Health (NIH Publication No. 85–23, revised 1996) and the experimental protocol used in this investigation was approved by the University of Alberta Animal Policy and Welfare Committee (Edmonton, Alberta, Canada).

### Working Heart Perfusion

One hundred eleven male Sprague-Dawley rats (350–400 g) were anesthetized with pentobarbital (150 mg/kg, intraperitoneally). Hearts were rapidly removed and perfused initially in a nonworking Langendorff mode with Krebs-Henseleit solution for 15 min. The working mode perfusion was established (11.5 mmHg preload, 80 mmHg afterload, 5 Hz) with a recirculating perfusate of 100 ml (37°C, pH 7.4) gassed with 95%  $\text{O}_2$ /5%  $\text{CO}_2$  mixture that consisted of a modified Krebs-Henseleit solution containing (mM): KCl (4.7), NaCl (118),  $\text{KH}_2\text{PO}_4$  (1.2),  $\text{MgSO}_4$  (1.2),  $\text{CaCl}_2$  (2.5),  $\text{NaHCO}_3$  (25), glucose (11) palmitate (1.2, prebound to 3% bovine serum albumin) and insulin 100 mU/l. Hearts were paced at 5 Hz.

### Measurements of Left Ventricular Work

Cardiac output (ml/min) and aortic flow (ml/min) were measured using ultrasonic flow probes (Transonic T206, Transonic Systems Inc., Ithaca, NY) placed in the left atrial inflow and the aortic outflow lines.<sup>14</sup> Left ventricular work (ml/min  $\cdot$  mmHg) was calculated as left ventricular work = cardiac output  $\cdot$  (aortic systolic pressure - preload). Coronary flow (ml/min) was calculated as the difference between cardiac output and aortic flow.

### Measurement of Beat-to-Beat Intracellular $[\text{Ca}^{2+}]_i$

The measurements of intracellular  $[\text{Ca}^{2+}]_i$  ( $[\text{Ca}^{2+}]_i$ ) were performed as described previously.<sup>15</sup> The hearts were loaded with 5  $\mu\text{M}$  fluorescent  $\text{Ca}^{2+}$  indicator indo-1 AM (TEFLabs, Austin, TX) dissolved in dimethyl sulfoxide (final concentration less than 0.25%) for 25 min during the working mode perfusion. After a washout period of 5 min in the Langendorff mode, the working mode was reestablished with fresh modified Krebs-Henseleit solution using a second perfusion circuit and the hearts were assigned to the treatment groups. Indo-1 fluorescence was measured from a small area (approximately 0.3  $\text{cm}^2$ ) of the epicardial surface of the left ventricle free wall using a spectrofluorometer (Photon Technology International, London, Ontario, Canada) (see Supplemental Digital Content 1, <http://links.lww.com/ALN/A814>). Signals were acquired at 500 Hz, and the ratio of indo-1 fluorescence emitted at 405 nm and 485 nm (F405/F485 ratio) was calculated to provide an index of  $[\text{Ca}^{2+}]_i$ . Diastolic  $[\text{Ca}^{2+}]_i$ , systolic  $[\text{Ca}^{2+}]_i$ , and  $\text{Ca}^{2+}$  transient amplitude were determined.

### Experimental Protocols

After 15 min of perfusion in the working mode, all hearts were subjected to 20 min of 37°C zero-flow ischemia and 30

min of reperfusion (see Supplemental Digital Content 1, <http://links.lww.com/ALN/A814>). All treatments were initiated 15 min before ischemia and continued until the end of reperfusion. The duration of 20 min of global ischemia induced marked left ventricular dysfunction. Longer periods of global ischemia would have resulted in no functional recovery at reperfusion, which would have biased measurements of  $[Ca^{2+}]_i$ . Hearts were assigned to one of the following 15 groups: (1) time-matched perfusion without treatment (IR) (n = 8), (2) sevoflurane (Abbott Canada, Saint-Laurent, Québec, Canada) (SEVO+IR) 2 vol.-% (n = 8), (3) propofol 10  $\mu$ M (n = 6) (PROP+IR) in the formulation of Diprivan® 1% (AstraZeneca Canada, Mississauga, Ontario, Canada), (4) remifentanyl (Abbott Canada) 3 nM (REMI+IR) (n = 9), (5) N-2-mercaptpropionyl-glycine (MPG, Sigma-Aldrich, Oakville, Ontario, Canada) 10  $\mu$ M (MPG+IR) (n = 5), (6) sevoflurane 2 vol.-% plus propofol 10  $\mu$ M (SEVO/PROP+IR) (n = 9), (7) remifentanyl 3 nM plus propofol 10  $\mu$ M (REMI/PROP+IR) (n = 7), (8) sevoflurane 2 vol.-% plus remifentanyl 3 nM (SEVO/REMI+IR) (n = 9), (9) sevoflurane 2 vol.-% plus MPG 10  $\mu$ M (SEVO/MPG+IR) (n = 5), (10) sevoflurane 2 vol.-% plus Intralipid 10% (Sigma-Aldrich) (SEVO/INTRA+IR; corresponding to Intralipid control of propofol 100  $\mu$ M) (n = 6), (11) remifentanyl 3 nM plus MPG 10  $\mu$ M (REMI/MPG+IR) (n = 6). Additional groups (12–14) were studied to determine the concentration-response relationship for the sevoflurane 2 vol.-% - propofol interaction (0.1, 1, and 100  $\mu$ M) (n = 7 for each concentration) and (15) to test whether Intralipid alone affects functional recovery or  $Ca^{2+}$  overload after IR (n = 6). Hearts with time-matched aerobic perfusion served to determine baseline phosphoprotein levels (n = 6). At the end of the perfusions, all hearts were immediately frozen in liquid nitrogen with Wollenberger clamps and stored at  $-80^{\circ}C$  for subsequent molecular analyses.

### Immunoblotting of Calcium/Calmodulin-dependent Protein Kinase Type II $\delta$ , Phospholamban, and Ryanodine Receptor-2

Tissue homogenate was used for immunoblotting of calcium/calmodulin-dependent protein kinase type II $\delta$  (CaMKII $\delta$ ) in 8% sodium dodecyl sulfate polyacrylamide gel electrophoresis (SDS-PAGE) and for phospholamban in 10% SDS-PAGE. The following primary antibodies were used: rabbit anti-CaMKII $\delta$  (1:500) (Abcam, Cambridge, MA), rabbit antiThr286-CaMKII $\delta$  (1:1000) (Abcam), anti-phospholamban (1:500) (Abcam), antiThr17-phospholamban, and antiSer16-phospholamban (1:300) (Santa Cruz Biotechnology, Inc., Santa Cruz, CA). For ryanodine receptor-2 (RyR2) immunoblots, sarcoplasmic reticulum fractions were prepared. Frozen heart tissue was homogenized in ice-cold buffer containing 10 mM Hepes (pH 7.4), 1.5 mM  $MgCl_2$ , 10 mM KCl, 0.3 M sucrose, and 0.05% Nonidet

P-40 and centrifuged at 500 g for 10 min at  $4^{\circ}C$ . The resulting supernatant was centrifuged at 100,000 g for 45 min and the obtained pellet was suspended in buffer containing 50 mM Tris (pH 7.4), 2 mM EDTA, 0.15 M NaCl, 1% Nonidet P-40, 0.1% SDS, and 5 mM 1,4-dithiothreitol supplemented with protease and phosphatase inhibitor cocktail mix (Sigma-Aldrich). There were 60  $\mu$ g of protein subjected to electrophoresis on a 5% gel and the following primary antibodies anti-RyR2 (1:1000) (Abcam) and antiSer2814-RyR2 (1:1000) (Badrilla Ltd., Leeds, United Kingdom) were used. Protein concentration was measured (Bradford assay) to ensure that equal amounts of protein were subjected to electrophoresis. Immunoreactivity was visualized by horseradish peroxidase-conjugated antibodies using a peroxidase-based chemiluminescence detection kit (ECL) (PerkinElmer, Woodbridge, Ontario, Canada). The intensity of the bands was quantified using ImageJ\*\* software. Phosphorylation was normalized to the expression of the corresponding total protein. Actin (I-19; Santa Cruz) and/or  $\alpha$ -tubulin (clone B-5-1-2; Sigma-Aldrich) were used as loading controls.

### Statistical Analysis

Values are given as mean (SD) or median (interquartile range) except for figures 1 and 2 where standard errors of the mean (SEM) are given to avoid confusion with multiple overlapping lines. With an expected difference of 50% between group means, 20% SD of the means, significant levels of  $\alpha = 0.05$  and  $\beta = 0.8$ , a sample size of five hearts per group was necessary.<sup>15</sup> Time-dependent measurements were analyzed by two-way repeated measures analysis of variance (ANOVA) followed by multiple comparison procedures (Student-Newman-Keuls method). The significance of differences in hemodynamic and calcium measurements among groups was determined by unpaired two-tailed Student *t* test (two groups) or by one-way ANOVA followed by the Holm-Sidak method or by Kruskal-Wallis one-way ANOVA on ranks followed by the Dunn method for *post hoc* analysis, depending on the underlying data distribution. Differences are considered significant if  $P < 0.05$ . Statistical analyses were performed using Sigmaplot Version 11.0 (Systat Software, Inc., Chicago, IL).

## Results

### Single Treatments—Sevoflurane, Remifentanyl, and Propofol Exert Differential Effects on Functional Recovery and $Ca^{2+}$ Overload in Working Rat Hearts Exposed to IR

Periischemic sevoflurane (2 vol.-%) and remifentanyl (3 nM) treatment similarly improved recovery of left ventricular work during reperfusion when compared with untreated hearts (fig. 1). These beneficial actions were accompanied by higher peak systolic pressures, stroke volumes, and coronary flows (see Supplemental Digital Content 2, <http://links.lww.com/ALN/A815>). Interestingly, the amplitudes of the  $Ca^{2+}$  transients in hearts exposed to remifentanyl (3 nM) were lower, but left ventricular

\*\* National Institutes of Health, Bethesda, Maryland. Available at: <http://rsbweb.nih.gov/ij/>. Accessed December 1, 2008.

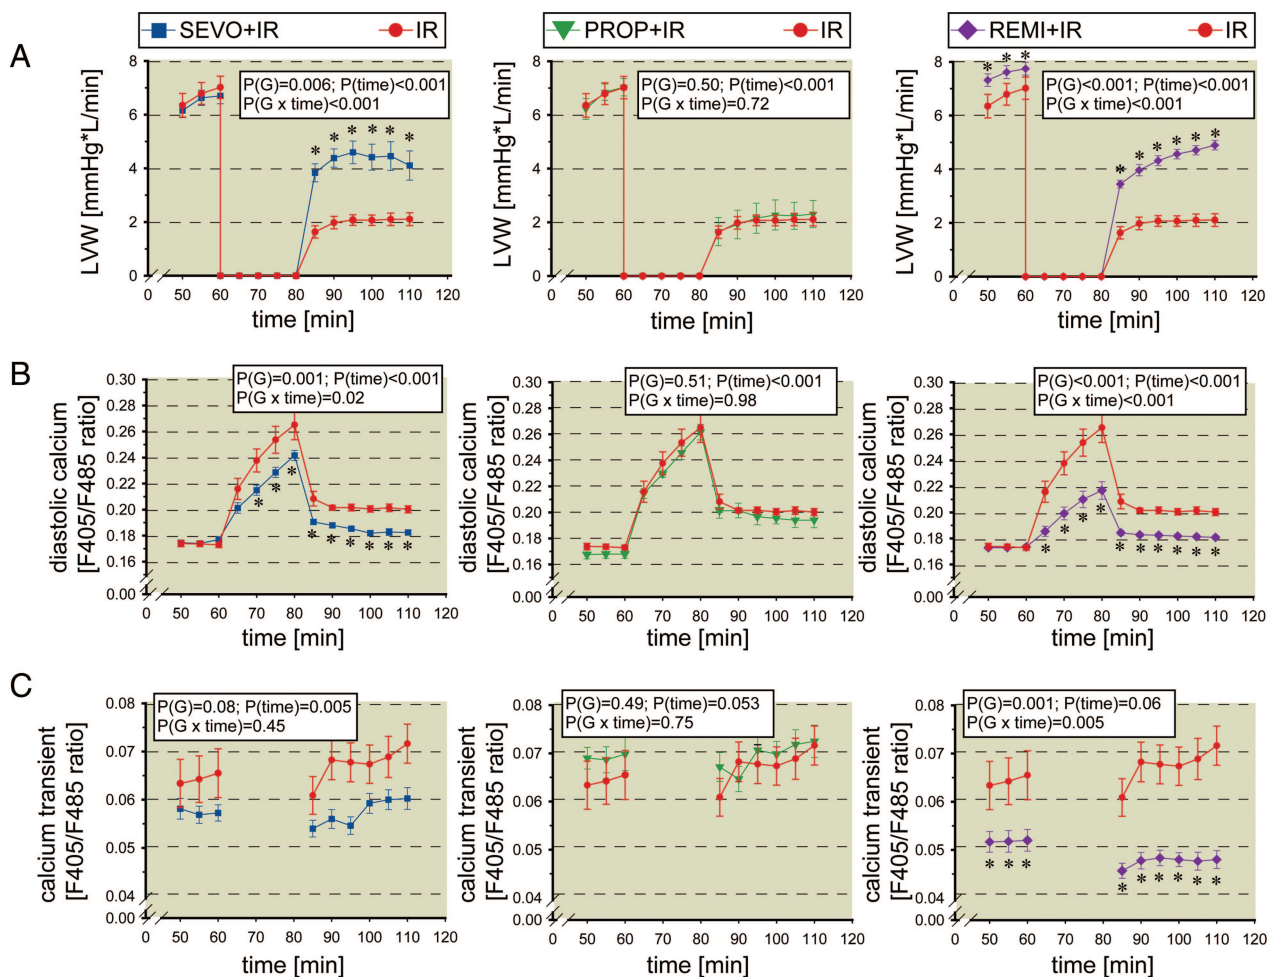

**Fig. 1.** Single treatments. (A) Left ventricular work (LVW). (B) Left ventricular diastolic  $[Ca^{2+}]_i$ . (C)  $Ca^{2+}$  transient. IR, hearts exposed to ischemia–reperfusion without treatment; SEVO+IR, periischemic treatment with sevoflurane 2 vol.-%; PROP+IR, periischemic treatment with propofol 10  $\mu$ M; REMI+IR, periischemic treatment with remifentanyl 3 nM; G, group; G  $\times$  time, group-time interaction. \*  $P < 0.05$  compared with IR. Data are mean  $\pm$  SEM.

work was higher than in untreated hearts; the lack of positive correlation suggests that remifentanyl prevented ischemia-induced  $Ca^{2+}$  desensitization. Remifentanyl and sevoflurane comparably reduced postischemic diastolic  $[Ca^{2+}]_i$ , a sensitive marker of ischemic damage. Peak ischemic  $[Ca^{2+}]_i$  was lower in remifentanyl-treated than sevoflurane-treated hearts ( $P = 0.008$ ). Consistent with previous results,<sup>15</sup> treatment with propofol 10  $\mu$ M did not improve functional recovery or decrease postischemic  $Ca^{2+}$  overload. Intralipid alone or in combination with sevoflurane did not affect functional recovery or  $Ca^{2+}$  overload (see Supplemental Digital Content 3, <http://links.lww.com/ALN/A816>).

**Combination Treatments—Propofol Antagonizes Sevoflurane but Not Remifentanyl-mediated Cardioprotection in a Concentration-dependent Manner**

Concomitant administration of propofol 10  $\mu$ M with sevoflurane 2 vol.-% did not reduce left ventricular work under aerobic conditions, but completely abolished sevoflurane-mediated improvement in the recovery of post-

ischemic left ventricular work (fig. 2). Peak ischemic  $[Ca^{2+}]_i$  and postischemic  $Ca^{2+}$  transient amplitudes were not altered by the combination treatment when compared with sevoflurane alone. However, the addition of propofol to sevoflurane prevented the beneficial effects of sevoflurane on postischemic diastolic  $[Ca^{2+}]_i$  and values were increased to levels measured in untreated hearts. In contrast, administration of propofol 10  $\mu$ M with remifentanyl 3 nM did not interfere with remifentanyl-induced cardioprotection. Examination of the concentration-response relationship for propofol-mediated inhibition of sevoflurane-mediated protection indicates that 1  $\mu$ M propofol reduced functional recovery elicited by sevoflurane by 33% ( $P = 0.004$ ) (fig. 3A) and increased diastolic  $[Ca^{2+}]_i$  by 6% compared with protected hearts (fig. 3, B and C). Only the lowest concentration of propofol (0.1  $\mu$ M) did not diminish sevoflurane-induced protection. Our demonstration that the different combinations of anesthetics exhibit disparate interactions is likely due to distinct mechanisms of cardioprotection.

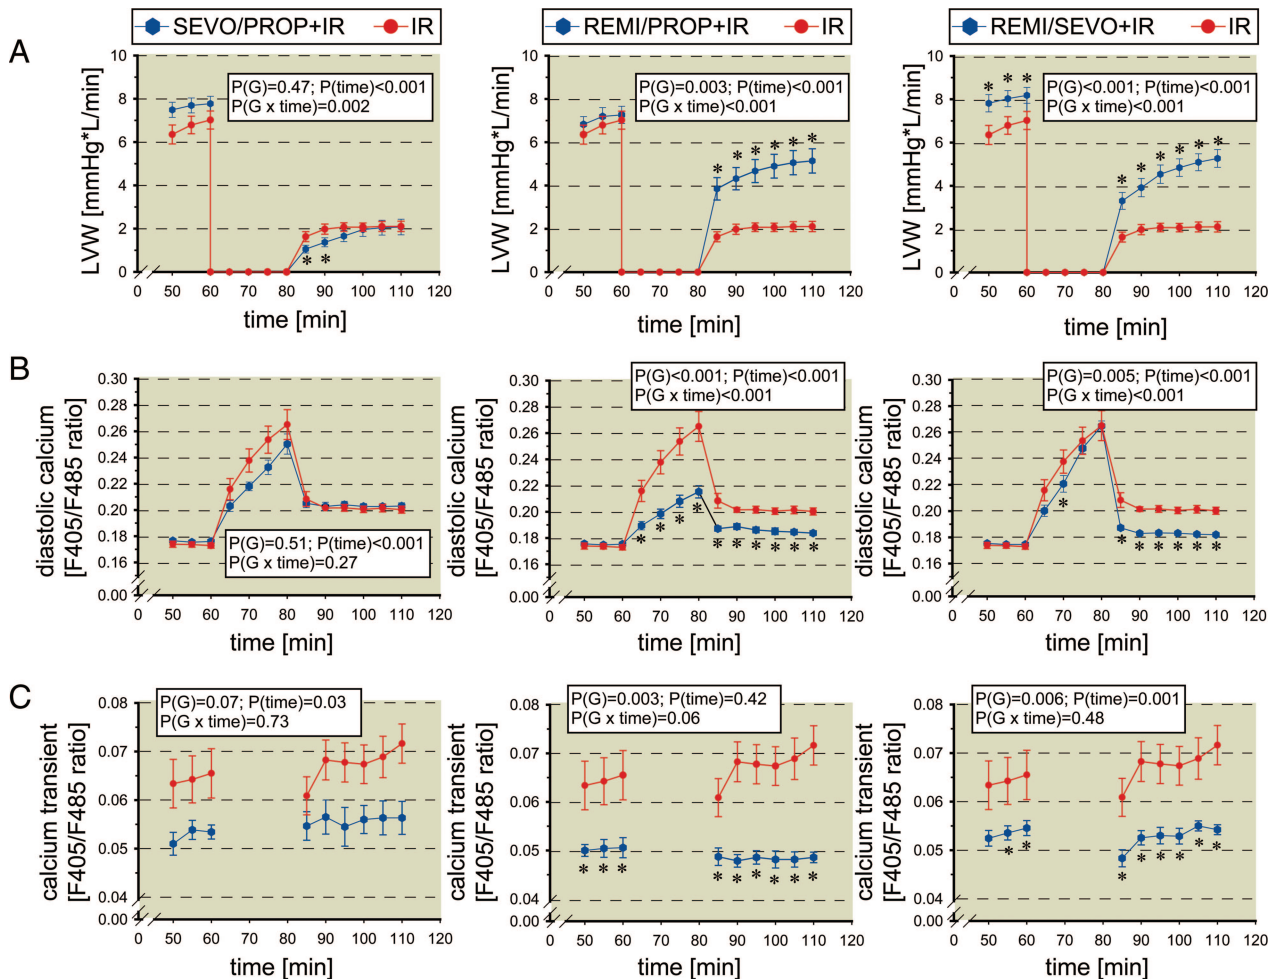

**Fig. 2.** Combination treatments. (A) Left ventricular work (LVW). (B) Left ventricular diastolic  $[\text{Ca}^{2+}]_i$ . (C)  $\text{Ca}^{2+}$  transient. IR, hearts exposed to ischemia-reperfusion without treatment; SEVO/PROP+IR, periischemic sevoflurane (2 vol.-%) plus propofol (10  $\mu\text{M}$ ) treatment; REMI/PROP+IR, periischemic remifentanyl (3 nM) plus propofol (10  $\mu\text{M}$ ) treatment; REMI/SEVO+IR, periischemic remifentanyl (3 nM) plus sevoflurane (2 vol.-%) treatment; G, group; G  $\times$  time, group-time interaction. \*  $P < 0.05$  compared with IR. Data are mean  $\pm$  SEM.

To demonstrate the ability of MPG, a known scavenger of reactive oxygen species (ROS) similar to propofol, to mimic the antagonistic actions of propofol, MPG 10  $\mu\text{M}$  was concomitantly administered to sevoflurane 2 vol.-%. Although MPG 10  $\mu\text{M}$  alone did not affect postischemic functional recovery or  $\text{Ca}^{2+}$  overload compared with unprotected hearts, MPG completely abolished sevoflurane-mediated protection similar to propofol (fig. 4). This confirms previous experiments showing the essential role of ROS in sevoflurane preconditioning.<sup>16,17</sup> Finally, when remifentanyl 3 nM was added to sevoflurane 2 vol.-%, functional recovery was similar to sevoflurane alone or to remifentanyl alone. Unexpectedly, this combination markedly increased peak ischemic  $[\text{Ca}^{2+}]_i$  ( $P < 0.001$ ) and  $\text{Ca}^{2+}$  transient ( $P = 0.02$ ) compared with remifentanyl alone, but did not increase postischemic  $\text{Ca}^{2+}$  overload (fig. 2B). Coadministration of MPG to remifentanyl did not block remifentanyl-induced cardioprotection (see Supplemental Digital Content 4, <http://links.lww.com/ALN/A817>).

### Choice of Anesthetic Combination Determines Sarcoplasmic Reticulum $\text{Ca}^{2+}$ Leak after IR Injury in the Working Rat Heart

Because CaMKII $\delta$  activity is known to play a causal role in postischemic  $\text{Ca}^{2+}$  overload and  $\text{Ca}^{2+}$  leak from the sarcoplasmic reticulum,<sup>18,19</sup> CaMKII $\delta$  phosphorylation at Thr286 was determined in aerobic hearts as well as in postischemic hearts that were either untreated or that were exposed to single and combination treatments. These experiments show that CaMKII $\delta$  phosphorylation was very low in aerobic hearts, but was significantly increased in untreated postischemic hearts. In hearts exposed to cardioprotective single or combination treatments, CaMKII $\delta$  phosphorylation was inhibited, whereas unprotected hearts exhibited markedly higher phosphorylation levels (fig. 5). Similarly, examination of ratios of phospho-RYR2 to total RYR2 indicates that RYR2, a downstream target of CaMKII $\delta$ , was significantly more phosphorylated in the nonprotective combination treatment, sevoflurane plus propofol, as opposed to

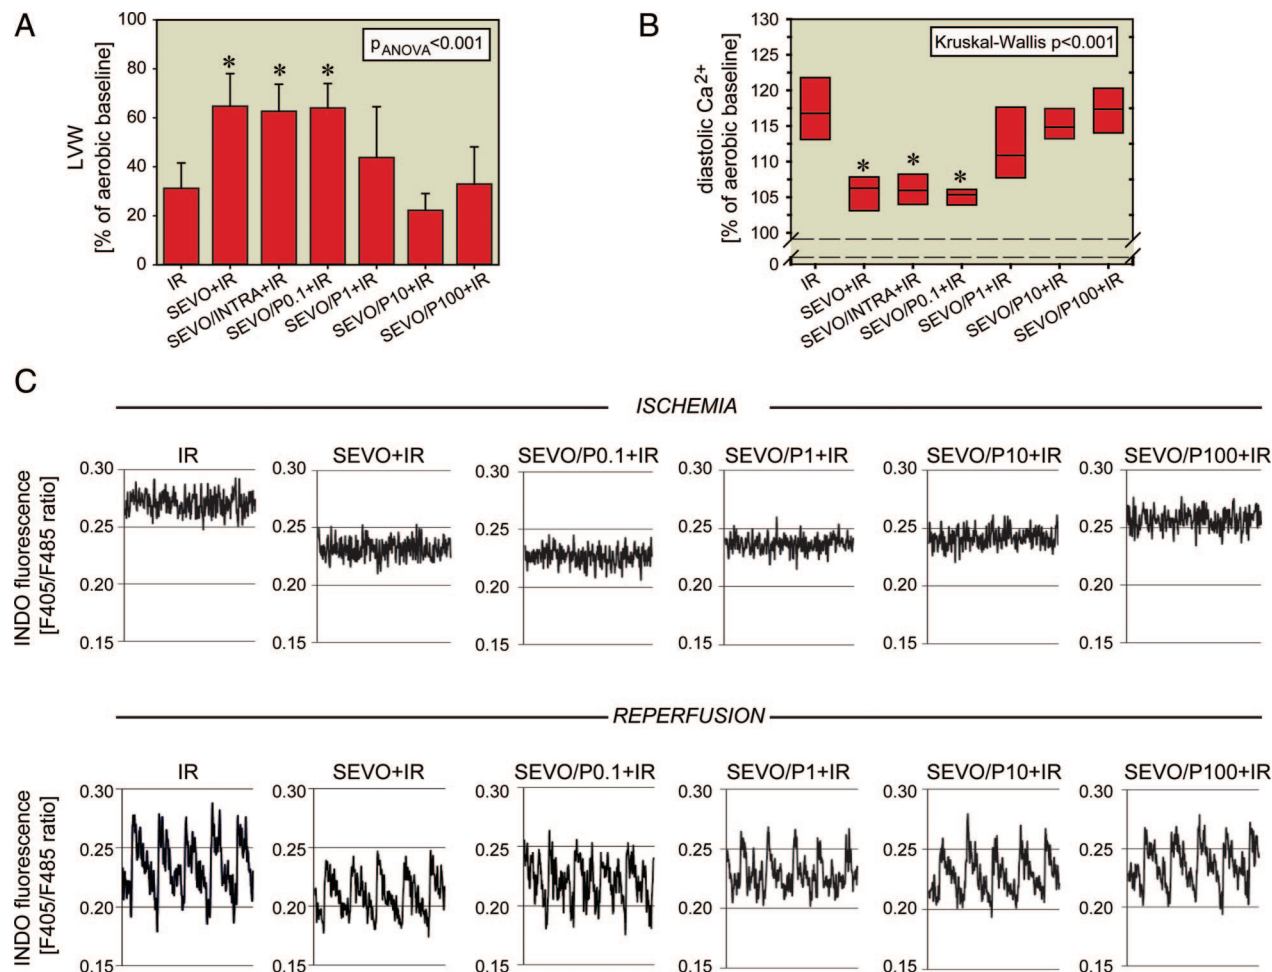

**Fig. 3.** Concentration-response curve of propofol-mediated inhibition of sevoflurane protection. (A) Left ventricular work (LVW). (B) Diastolic  $[Ca^{2+}]_i$ . (C) Representative  $[Ca^{2+}]_i$  traces of 1-s duration. INDO,  $Ca^{2+}$  indicator indo-1 AM; IR, ischemia–reperfusion alone; SEVO+IR, periischemic sevoflurane treatment (2 vol.-%); SEVO/P0.1+IR, periischemic sevoflurane (2 vol.-%) plus propofol (0.1  $\mu$ M) treatment; SEVO/P1+IR, periischemic sevoflurane (2 vol.-%) plus propofol (1  $\mu$ M) treatment; SEVO/P10+IR, periischemic sevoflurane (2 vol.-%) plus propofol (10  $\mu$ M) treatment; SEVO/P100+IR, periischemic sevoflurane (2 vol.-%) plus propofol (100  $\mu$ M) treatment. \*  $P < 0.05$  compared with IR. Data are mean  $\pm$  SD (A) and median (25th, 75th percentile) (B).

the protective combo-treatments, sevoflurane plus remifentanyl, or propofol plus remifentanyl (fig. 6). Phosphorylation of phospholamban at position Thr17, which is selectively mediated by CaMKII $\delta$ , and at position Ser16, which is selectively mediated by protein kinase A, was not different between unprotected and protected hearts (see Supplemental Digital Content 5, <http://links.lww.com/ALN/A818>) implying that the postischemic sarcoplasmic  $Ca^{2+}$  leak in this model is not caused by phospholamban phosphorylation but is due to selective phosphorylation of RyR2 by activated CaMKII $\delta$ .

## Discussion

Our study systematically investigated the interactions of commonly applied classes of anesthetics on cardioprotection. For this purpose, the isolated working rat heart model perfused with glucose and palmitate as metabolic substrates was used to measure left ventricular work and beat-to-beat oscil-

lations in intracellular  $Ca^{2+}$  during IR injury. The anesthetics or their combinations were administered before, during, and after the ischemic insult and therefore mimic clinical protocols. We report the following salient findings. First, when the anesthetics were administered as single treatments remifentanyl or sevoflurane, but not propofol, markedly improved the recovery of left ventricular mechanical function and decreased diastolic  $Ca^{2+}$  overload. This is consistent with previous findings showing no protection with propofol at concentrations as high as 100  $\mu$ M.<sup>12,15</sup> Second, in the combination treatments propofol had no effect on remifentanyl-induced cardioprotection, but antagonized sevoflurane-induced cardioprotection in a concentration-dependent manner. Antagonism was clearly demonstrable at low sedative concentrations of propofol (1  $\mu$ M). Conversely, the combination of the two protective drugs, sevoflurane (2 vol.-%) and remifentanyl (3 nM), preserved protection but did not show additive or synergistic interactions. Finally, our

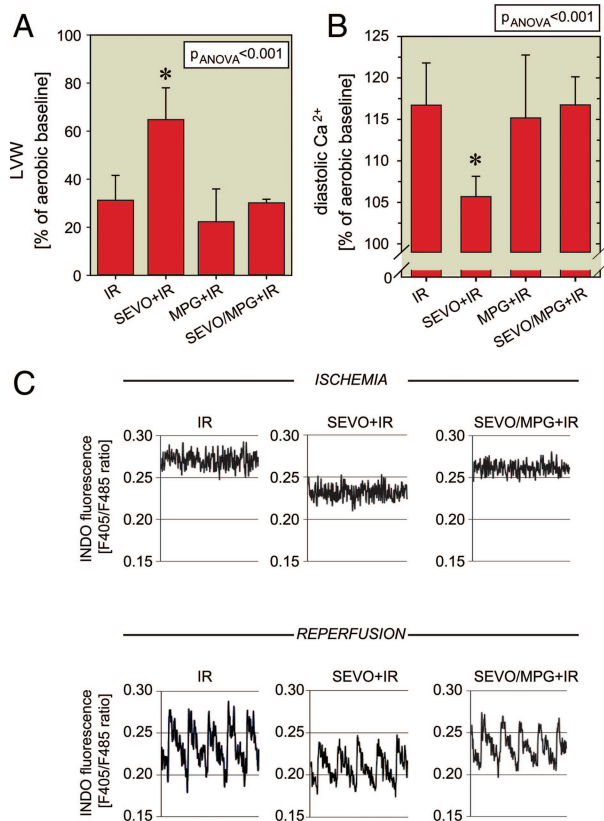

**Fig. 4.** Mimicking inhibitory propofol-effects with *N*-2-mercaptopyropionyl-glycine (MPG). (A) Left ventricular work (LVW). (B) Diastolic  $[Ca^{2+}]_i$ . (C) Representative  $[Ca^{2+}]_i$  traces of 1-s duration. INDO,  $Ca^{2+}$  indicator indo-1 AM; IR, ischemia–reperfusion alone; SEVO+IR, periischemic sevoflurane treatment (2 vol.-%); SEVO/MPG+IR, periischemic sevoflurane (2 vol.-%) plus MPG (10  $\mu$ M) treatment. \*  $P < 0.05$  compared with IR. Data are mean  $\pm$  SD.

experiments demonstrate that posts ischemic diastolic  $Ca^{2+}$  overload in the myocardium exposed to the various anesthetic combinations correlates closely with CaMKII $\delta$  activation and  $Ca^{2+}$  leak from the sarcoplasmic reticulum as reflected by hyperphosphorylation of the RyR2. The clinical consequences of such interactions, particularly the antagonistic action of low concentrations of propofol on sevoflurane-induced protection, need careful evaluation.

### Postischemic $Ca^{2+}$ Handling in Anesthetic Combinations

$Ca^{2+}$  is vital for modulating cellular functions, serves as activator of the contractile apparatus, and regulates the release and uptake of  $Ca^{2+}$  from the sarcoplasmic reticulum.<sup>20</sup> At higher intracellular concentrations, however,  $Ca^{2+}$  is highly toxic and impairs left ventricular mechanical function and causes irreversible cell injury and death. It is therefore a sensitive and reliable marker of cellular dysfunction during and after IR injury. In quiescent cardiomyocytes, cytosolic  $Ca^{2+}$  concentrations reach approximately  $1-2 \times 10^{-7}$  M, which is 10,000-fold lower compared with the extracellular space. Elevation of average intracellular  $Ca^{2+}$  concentration en-

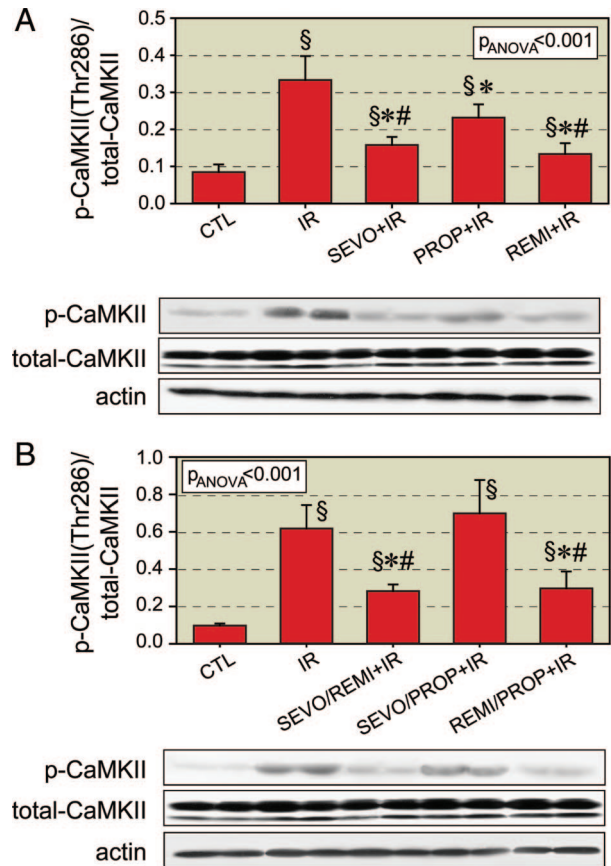

**Fig. 5.** CaMKII $\delta$  (56 kDa) phosphorylation in single (A) and combination treatments (B). CaMKII $\delta$  activity was estimated from the ratio of p-CaMKII $\delta$  and total CaMKII $\delta$ . Actin (42 kDa) was used as loading control. CTL, time-matched aerobic control; IR, ischemia–reperfusion alone; SEVO+IR, periischemic sevoflurane treatment (2 vol.-%); PROP+IR, periischemic propofol treatment (10  $\mu$ M); REMI+IR, periischemic remifentanyl treatment (3 nM); SEVO/PROP+IR, periischemic sevoflurane (2 vol.-%) plus propofol (10  $\mu$ M) treatment; REMI/PROP+IR, periischemic remifentanyl (3 nM) plus propofol (10  $\mu$ M) treatment; REMI/SEVO+IR, periischemic remifentanyl (3 nM) plus sevoflurane (2 vol.-%) treatment. \*  $P < 0.05$  compared with IR. #  $P < 0.05$  compared with PROP+IR or SEVO/PROP+IR.  $\S$   $P < 0.05$  compared with CTL. Data are mean  $\pm$  SD.

hances binding of  $Ca^{2+}$  to calmodulin, the intracellular  $Ca^{2+}$  sensor, which subsequently interacts with more than 100 proteins, one of which is CaMKII $\delta$ , the predominant isoform of CaMKII expressed in the heart.<sup>20</sup> The  $Ca^{2+}$ -calmodulin complex promotes CaMKII $\delta$  autophosphorylation at Thr286, which in turn enhances its affinity to  $Ca^{2+}$ -calmodulin ensuing additional autophosphorylation at Thr305 and Thr306. Phosphorylated CaMKII $\delta$  critically affects the release of  $Ca^{2+}$  from the sarcoplasmic reticulum *via* phosphorylation of RyR2 at Ser2814. CaMKII $\delta$  further regulates sarcoplasmic  $Ca^{2+}$  uptake by phospholamban phosphorylation at Thr17, diminishing its inhibitory effects on sarcoplasmic reticulum  $Ca^{2+}$  ATPase, cardiac isoform (SERCA2a), which pumps  $Ca^{2+}$  from the cytoplasm back

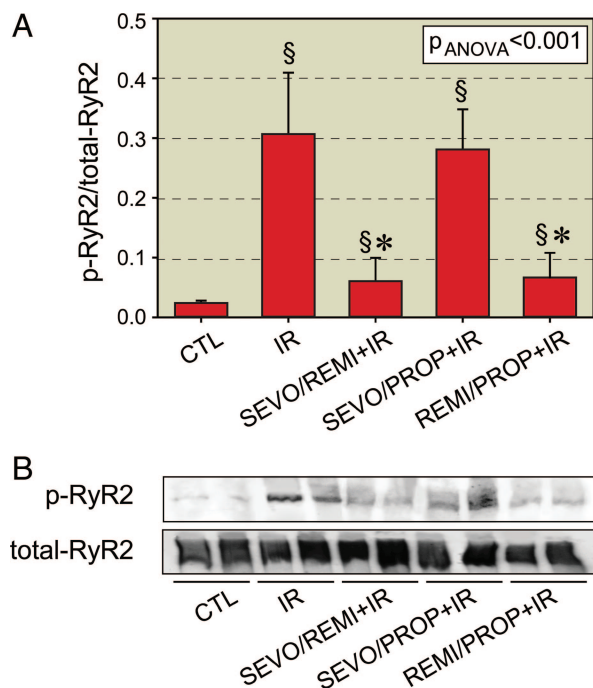

**Fig. 6.** Ryanodine receptor-2 (RyR2; 560 kDa) phosphorylation given as ratio between p-RyR2 to total RyR2 for combo treatments (A) and representative immunoblots (B). CTL, time-matched aerobic control; IR, ischemia-reperfusion alone; SEVO/PROP+IR, periischemic sevoflurane (2 vol.-%) plus propofol (10  $\mu$ M) treatment; REMI/PROP+IR, periischemic remifentanyl (3 nM) plus propofol (10  $\mu$ M) treatment; REMI/SEVO+IR, periischemic remifentanyl (3 nM) plus sevoflurane (2 vol.-%) treatment. \*  $P < 0.05$  compared with IR. §  $P < 0.05$  compared with CTL. Data are mean  $\pm$  SD.

into the sarcoplasmic reticulum against a 10,000-fold concentration gradient.<sup>20</sup> Thus, measurements of the phosphorylation status of CaMKII $\delta$  and its downstream targets RyR2 and phospholamban serve as useful indices of the mechanisms that regulate  $Ca^{2+}$  leak and  $Ca^{2+}$  sequestration, respectively. Our finding that CaMKII $\delta$  phosphorylation was increased during reperfusion suggests that the reduced left ventricular work and enhanced intracellular  $Ca^{2+}$  overload occurred in response to CaMKII $\delta$ -mediated facilitation of  $Ca^{2+}$  release from the sarcoplasmic reticulum by the RyR2. In support, increased CaMKII $\delta$  activity has been reported in failing human hearts<sup>21</sup> and rabbit hearts after coronary artery ligation.<sup>22</sup> Multiple studies have also shown a close relation between CaMKII $\delta$  activity and apoptosis.<sup>23,24</sup> Moreover, CaMKII $\delta$  activation *per se* exerts direct detrimental effects. Transgenic overexpression of CaMKII $\delta$  causes hyperphosphorylation of RyR2 with subsequent diastolic  $Ca^{2+}$  leakage from the sarcoplasmic reticulum, leading to arrhythmias or heart failure.<sup>25</sup> In contrast, inhibition of CaMKII $\delta$ , by transgenic overexpression of an inhibitory peptide, abolishes cardiac deterioration after infarction.<sup>26</sup> Despite the differential CaMKII $\delta$  activation in protective *versus* nonprotective anesthetic combinations in our experiments, phospholamban phosphorylation was not different among the treatments.

This is similar to previous observations in rat cardiomyocytes where selective hyperphosphorylation of the RyR2 at Ser2814 without simultaneous alterations in phospholamban phosphorylation was shown.<sup>27</sup> Collectively, CaMKII $\delta$  activation with subsequent hyperphosphorylation of RyR2 reflects a common feature of impaired postischemic  $Ca^{2+}$  handling in hearts exposed to nonprotective anesthetic combinations. On the other hand, protective anesthetic combinations prevent hyperphosphorylation of RyR2 and thereby enable improved  $Ca^{2+}$  homeostasis and enhanced functional recovery after IR.

### Molecular Pathways in Anesthetic Combinations

Sevoflurane- and opioid-induced cardioprotection share many signaling components such as PKC, mitochondrial  $K_{ATP}$  channels, and ROS.<sup>17,28</sup> While ROS may be essential in sevoflurane-induced protection,<sup>16,17</sup> other mechanisms, such as  $\delta$ - and  $\kappa$ -opioid or *N*-methyl-D-aspartate receptor activation may be more important in remifentanyl protection.<sup>9,29</sup> It is noteworthy that  $Ca^{2+}$  transient amplitudes in remifentanyl-treated hearts were lower than in sevoflurane-treated hearts even during preischemic aerobic conditions. This points to additional differences in the mechanism of action of these two agents on  $Ca^{2+}$  homeostasis and  $Ca^{2+}$  sensitivity, and suggests that their cardioprotective mechanisms may be distinct. This dissociation between  $Ca^{2+}$  transient amplitude and cardiac contractility, indicative of enhanced  $Ca^{2+}$  sensitization, was published previously based on studies in isolated rat cardiomyocytes—a model where contractility was not measured,<sup>30</sup> and isolated perfused rat hearts,<sup>31</sup> where remifentanyl had marked positive inotropic action. Together, these data indicate that there is an increase in  $Ca^{2+}$  sensitization in the presence of remifentanyl. This is consistent with less  $Ca^{2+}$  loading and may contribute to its cardioprotective effectiveness. The participation of ROS in sevoflurane-induced but not remifentanyl-induced protection is supported by the observation that the ROS scavenger MPG, with properties similar to propofol, markedly reduces the salutary effects of sevoflurane but not remifentanyl. This mechanism also explains the lack of inhibitory effects of the ROS scavenger propofol on remifentanyl-induced protection. Although a previous study showed inhibitory effects of propofol on permeability transition opening in mitochondria during reperfusion,<sup>8</sup> which is likely due to the scavenging effects of propofol, we and others were unable to demonstrate any protection by propofol, even at high concentrations.<sup>12,15</sup>

According to the commonly accepted threshold theory of preconditioning, which implies that a certain degree of stimulation is required to reach the level where a cell or organ is able to activate its endogenous protection program, it would be conceivable that the application of two well-defined protection stimuli should induce a more consistent and reliable overall cell protection. Indeed, morphine enhances isoflurane preconditioning and postconditioning in hearts sub-



jected to coronary artery ligation *in vivo*.<sup>13,32</sup> However, in our experiments, we did not observe any synergistic or additive protection in hearts treated with a combination of sevoflurane (2 vol.-%) and remifentanyl (3 nM). It is possible that the maximum preconditioning trigger stimulus has been already reached with 2 vol.-% sevoflurane alone or 3 nM remifentanyl alone, making the protection elicited by the second drug redundant. In addition, we cannot exclude that a more sustained ischemic injury might uncover additive cardioprotective effectiveness in hearts exposed to a sevoflurane-remifentanyl combination. Nonetheless, 2 vol.-% sevoflurane and 3 nM remifentanyl are relatively low concentrations compared with those previously used to elicit effective cardioprotection.<sup>3,9</sup> In addition, the extent of improvement in functional recovery and attenuation of Ca<sup>2+</sup> overload in our working rat heart model by sevoflurane or remifentanyl still left room for further improvements.

### Clinical Implications

The potential for interactions between different protection strategies including pharmacologic agents and/or ischemic conditioning has been largely neglected in experimental and more so clinical studies in the past. However, the question of whether and how different anesthetic agents might interact to either antagonize or potentiate the beneficial effects of ischemia- or drug-induced cardioprotection is of great importance for the clinician, because a general anesthetic procedure consists of a mixture of drugs, and the most favorable cardioprotective combination of anesthetics should be preferentially used in at-risk patients. Our results from this study in rat hearts imply that the outcome in cardioprotection for combined therapies is highly context-sensitive and cannot be inferred or extrapolated from the assessment of single cardioprotective therapies. Indeed, our results suggest that the lack of standardization in the use of anesthetics (choice of combination, timing, and concentrations) may have contributed to ambiguous and contradictory results arising from both basic and clinical studies concerning anesthetic-induced cardioprotection, as well as preconditioning or postconditioning.

In conclusion, this study shows that the choice of anesthetic combination determines the functional recovery and postischemic Ca<sup>2+</sup> homeostasis in working rat hearts. We anticipate that results from these experiments may encourage the careful design of clinical studies so that perioperative cardioprotection can be optimized.

### References

1. Symons JA, Myles PS: Myocardial protection with volatile anaesthetic agents during coronary artery bypass surgery: A meta-analysis. *Br J Anaesth* 2006; 97:127-36
2. De Hert SG, ten Broecke PW, Mertens E, Van Sommeren EW, De Blier IG, Stockman BA, Rodrigus IE: Sevoflurane but not propofol preserves myocardial function in coronary surgery patients. *ANESTHESIOLOGY* 2002; 97:42-9
3. Julier K, da Silva R, Garcia C, Bestmann L, Frascarolo P, Zollinger A, Chassot PG, Schmid ER, Turina MI, von Segesser LK, Pasch T, Spahn DR, Zaugg M: Preconditioning by sevoflurane decreases biochemical markers for myocardial and renal dysfunction in coronary artery bypass graft surgery: A double-blinded, placebo-controlled, multicenter study. *ANESTHESIOLOGY* 2003; 98:1315-27
4. Piriou V, Mantz J, Goldfarb G, Kitakaze M, Chiari P, Paquin S, Cornu C, Lecharny JB, Aussage P, Vicaut E, Pons A, Lehot JJ: Sevoflurane preconditioning at 1 MAC only provides limited protection in patients undergoing coronary artery bypass surgery: A randomized bi-centre trial. *Br J Anaesth* 2007; 99:624-31
5. Fleisher LA, Beckman JA, Brown KA, Calkins H, Chaikof E, Fleischmann KE, Freeman WK, Froehlich JB, Kasper EK, Kersten JR, Riegel B, Robb JF, Smith SC Jr, Jacobs AK, Adams CD, Anderson JL, Antman EM, Buller CE, Creager MA, Ettinger SM, Faxon DP, Fuster V, Halperin JL, Hiratzka LF, Hunt SA, Lytle BW, Nishimura R, Ornato JP, Page RL, Tarkington LG, Yancy CW: ACC/AHA 2007 guidelines on perioperative cardiovascular evaluation and care for noncardiac surgery: A report of the American College of Cardiology/American Heart Association Task Force on Practice Guidelines (Writing Committee to Revise the 2002 Guidelines on Perioperative Cardiovascular Evaluation for Noncardiac Surgery); developed in collaboration with the American Society of Echocardiography, American Society of Nuclear Cardiology, Heart Rhythm Society, Society of Cardiovascular Anesthesiologists, Society for Cardiovascular Angiography and Interventions, Society for Vascular Medicine and Biology, and Society for Vascular Surgery. *Circulation* 2007; 116:e418-99
6. Tanaka K, Ludwig LM, Kersten JR, Pagel PS, Warltier DC: Mechanisms of cardioprotection by volatile anesthetics. *ANESTHESIOLOGY* 2004; 100:707-21
7. Zaugg M, Lucchinetti E, Uecker M, Pasch T, Schaub MC: Anaesthetics and cardiac preconditioning. Part I: Signalling and cytoprotective mechanisms. *Br J Anaesth* 2003; 91: 551-65
8. Halestrap AP, Clarke SJ, Javadov SA: Mitochondrial permeability transition pore opening during myocardial reperfusion—a target for cardioprotection. *Cardiovasc Res* 2004; 61: 372-85
9. Zhang Y, Irwin MG, Wong TM, Chen M, Cao CM: Remifentanyl preconditioning confers cardioprotection *via* cardiac kappa- and delta-opioid receptors. *ANESTHESIOLOGY* 2005; 102: 371-8
10. Zaugg M: Is protection by inhalation agents volatile? Controversies in cardioprotection. *Br J Anaesth* 2007; 99:603-6
11. Zaugg M, Lucchinetti E, Garcia C, Pasch T, Spahn DR, Schaub MC: Anaesthetics and cardiac preconditioning. Part II. Clinical implications. *Br J Anaesth* 2003; 91:566-76
12. Smul TM, Stumpner J, Blomeyer C, Lotz C, Redel A, Lange M, Roewer N, Kehl F: Propofol inhibits desflurane-induced preconditioning in rabbits. *J Cardiothorac Vasc Anesth* 2011; 25:276-81
13. Ludwig LM, Patel HH, Gross GJ, Kersten JR, Pagel PS, Warltier DC: Morphine enhances pharmacological preconditioning by isoflurane: Role of mitochondrial K(ATP) channels and opioid receptors. *ANESTHESIOLOGY* 2003; 98:705-11
14. Wang L, Ko KW, Lucchinetti E, Zhang L, Troxler H, Hersberger M, Omar MA, Posse de Chaves EI, Lopaschuk GD, Clanachan AS, Zaugg M: Metabolic profiling of hearts exposed to sevoflurane and propofol reveals distinct regulation of fatty acid and glucose oxidation: CD36 and pyruvate dehydrogenase as key regulators in anesthetic-induced fuel shift. *ANESTHESIOLOGY* 2010; 113:541-51
15. Lucchinetti E, Wang L, Ko KW, Troxler H, Hersberger M, Zhang L, Omar MA, Lopaschuk GD, Clanachan AS, Zaugg M: Enhanced glucose uptake *via* GLUT4 fuels recovery from calcium overload after ischaemia-reperfusion injury in sevoflurane- but not propofol-treated hearts. *Br J Anaesth* 2011; 106:792-800
16. Lamberts RR, Onderwater G, Hamdani N, Vredend MJ, Steen-

- huisen J, Eringa EC, Loer SA, Stienen GJ, Bouwman RA: Reactive oxygen species-induced stimulation of 5'AMP-activated protein kinase mediates sevoflurane-induced cardioprotection. *Circulation* 2009; 120:S10-5
17. Sedlic F, Pravidic D, Ljubkovic M, Marinovic J, Stadnicka A, Bosnjak ZJ: Differences in production of reactive oxygen species and mitochondrial uncoupling as events in the preconditioning signaling cascade between desflurane and sevoflurane. *Anesth Analg* 2009; 109:405-11
  18. Ogrodnik J, Niggli E: Increased Ca(2+) leak and spatiotemporal coherence of Ca(2+) release in cardiomyocytes during beta-adrenergic stimulation. *J Physiol* 2010; 588:225-42
  19. van Oort RJ, McCauley MD, Dixit SS, Pereira L, Yang Y, Respress JL, Wang Q, De Almeida AC, Skapura DG, Anderson ME, Bers DM, Wehrens XH: Ryanodine receptor phosphorylation by calcium/calmodulin-dependent protein kinase II promotes life-threatening ventricular arrhythmias in mice with heart failure. *Circulation* 2010; 122:2669-79
  20. Schaub MC, Hefti MA, Zaugg M: Integration of calcium with the signaling network in cardiac myocytes. *J Mol Cell Cardiol* 2006; 41:183-214
  21. Sossalla S, Fluschnik N, Schotola H, Ort KR, Neef S, Schulte T, Wittkpper K, Renner A, Schmitto JD, Gummert J, El-Armouche A, Hasenfuss G, Maier LS: Inhibition of elevated Ca2+/calmodulin-dependent protein kinase II improves contractility in human failing myocardium. *Circ Res* 2010; 107:1150-61
  22. Currie S, Smith GL: Calcium/calmodulin-dependent protein kinase II activity is increased in sarcoplasmic reticulum from coronary artery ligated rabbit hearts. *FEBS Lett* 1999; 459:244-8
  23. Toko H, Takahashi H, Kayama Y, Oka T, Minamino T, Okada S, Morimoto S, Zhan DY, Terasaki F, Anderson ME, Inoue M, Yao A, Nagai R, Kitaura Y, Sasaguri T, Komuro I: Ca2+/calmodulin-dependent kinase II $\delta$  causes heart failure by accumulation of p53 in dilated cardiomyopathy. *Circulation* 2010; 122:891-9
  24. Zhu W, Woo AY, Yang D, Cheng H, Crow MT, Xiao RP: Activation of CaMKII $\delta$  is a common intermediate of diverse death stimuli-induced heart muscle cell apoptosis. *J Biol Chem* 2007; 282:10833-9
  25. Maier LS, Zhang T, Chen L, DeSantiago J, Brown JH, Bers DM: Transgenic CaMKII $\delta$ C overexpression uniquely alters cardiac myocyte Ca2+ handling: Reduced SR Ca2+ load and activated SR Ca2+ release. *Circ Res* 2003; 92:904-11
  26. Zhang R, Khoo MS, Wu Y, Yang Y, Grueter CE, Ni G, Price EE Jr, Thiel W, Guatimosim S, Song LS, Madu EC, Shah AN, Vishnivetskaya TA, Atkinson JB, Gurevich VV, Salama G, Lederer WJ, Colbran RJ, Anderson ME: Calmodulin kinase II inhibition protects against structural heart disease. *Nat Med* 2005; 11:409-17
  27. Terentyev D, Belevych AE, Terentyeva R, Martin MM, Malana GE, Kuhn DE, Abdellatif M, Feldman DS, Elton TS, Gyrke S: miR-1 overexpression enhances Ca(2+) release and promotes cardiac arrhythmogenesis by targeting PP2A regulatory subunit B56 $\alpha$  and causing CaMKII-dependent hyperphosphorylation of RyR2. *Circ Res* 2009; 104:514-21
  28. Zaugg M, Lucchinetti E, Spahn DR, Pasch T, Garcia C, Schaub MC: Differential effects of anesthetics on mitochondrial K(ATP) channel activity and cardiomyocyte protection. *ANESTHESIOLOGY* 2002; 97:15-23
  29. Zhao M, Joo DT: Enhancement of spinal N-methyl-D-aspartate receptor function by remifentanyl action at delta-opioid receptors as a mechanism for acute opioid-induced hyperalgesia or tolerance. *ANESTHESIOLOGY* 2008; 109:308-17
  30. Zhang Y, Irwin MG, Li R, Chen ZW, Wong TM: Effects of remifentanyl on intracellular Ca(2+) and its transients induced by electrical stimulation and caffeine in rat ventricular myocytes. *Chin Med J (Engl)* 2009; 122:1439-43
  31. Grkan A, Birgl Y, Ziya K: Direct cardiac effects in isolated perfused rat hearts of fentanyl and remifentanyl. *Ann Card Anaesth* 2005; 8:140-4
  32. Weihrauch D, Krolikowski JG, Bienengraeber M, Kersten JR, Warltier DC, Pagel PS: Morphine enhances isoflurane-induced postconditioning against myocardial infarction: The role of phosphatidylinositol-3-kinase and opioid receptors in rabbits. *Anesth Analg* 2005; 101:942-9
